# Supplementary material for: Neck Circumference Is a Reliable Predictor for Hyperuricemia in Women With Polycystic Ovary Syndrome: a Case Control Study
Source: Research Square preprint supplement (doi:10.21203/rs.3.rs-545759/v1), 2021-05-26
Supplement: Supplementary file 1 [file 0b67866793975c3c3f9f54ad.docx]

**Supplementary Table 2. AUC, cut-off points, sensitivities, specificities, positive and negative predictive values of anthropometric measures for hyperuricemia**

| Variables | AUC | Cut-off points | Youden Index | SE (95% CI) | SP (95% CI) | PPV (%) | NPV (%) |
| --- | --- | --- | --- | --- | --- | --- | --- |
| NC (cm) | 0.792 | 32.00 | 0.48 | 87.23 (74.30 - 95.20) | 62.24 (53.80 - 70.20) | 43.16 | 93.68 |
| BMI (kg/m2) | 0.765 | 25.56 | 0.46 | 63.83 (48.50 - 77.30) | 81.82 (74.50 - 87.80) | 53.58 | 87.31 |
| WC (cm) | 0.745 | 82.00 | 0.42 | 70.21 (55.10 - 82.70) | 71.33 (63.20 - 78.60) | 44.60 | 87.93 |
| HC (cm) | 0.755 | 94.00 | 0.42 | 74.47 (59.70 - 86.10) | 67.83 (59.50 - 75.40) | 43.21 | 88.99 |

NC = neck circumference; BMI = body mass index; WC = waist circumference; HC = hip circumference; AUC = area under the curve; 95% CI = 95% confidence interval; SE = sensitivity; SP = specificity; PPV = positive predictive value; NPV = negative predictive value
